# Supplementary material for: The identification of metabolism-related subtypes and potential treatments for idiopathic pulmonary fibrosis
Source: Front Pharmacol. 2023 May 18;14:1173961. doi: 10.3389/fphar.2023.1173961 (PMC10232787; doi:10.3389/fphar.2023.1173961)
Supplement: Supplementary file 1 [file Table1.XLS]

## Sheet: GSE70867 clinical data
	age	sex	survival_status	time	Subtype
GSM1820739	65	1	0	2926	C1
GSM1820740	76	1	1	305	C1
GSM1820741	68	1	1	557	C2
GSM1820742	56	1	1	151	C2
GSM1820743	70	1	1	1404	C2
GSM1820744	77	1	1	718	C2
GSM1820745	54	1	1	167	C1
GSM1820746	69	1	1	1054	C2
GSM1820747	49	1	1	574	C2
GSM1820748	79	0	1	198	C2
GSM1820749	78	0	1	1081	C2
GSM1820750	58	1	1	982	C2
GSM1820751	74	0	1	1272	C1
GSM1820752	76	1	0	2152	C2
GSM1820753	75	1	1	811	C1
GSM1820754	74	1	0	2498	C2
GSM1820755	76	1	1	97	C2
GSM1820756	72	1	1	82	C2
GSM1820757	76	1	1	824	C2
GSM1820758	72	0	1	620	C1
GSM1820759	56	1	0	1965	C2
GSM1820760	63	1	0	2237	C2
GSM1820761	50	1	1	373	C1
GSM1820762	67	1	1	933	C2
GSM1820763	77	0	0	1993	C1
GSM1820764	65	1	1	1176	C1
GSM1820765	78	1	1	221	C1
GSM1820766	63	1	1	975	C1
GSM1820767	53	1	1	1475	C2
GSM1820768	73	1	1	1769	C2
GSM1820769	74	1	1	277	C2
GSM1820770	75	1	1	1140	C1
GSM1820771	72	1	0	1813	C1
GSM1820772	70	1	1	432	C2
GSM1820773	77	1	1	905	C2
GSM1820774	54	1	1	893	C1
GSM1820775	68	1	0	1580	C1
GSM1820776	74	1	0	1461	C2
GSM1820777	60	1	1	1055	C2
GSM1820778	61	0	1	45	C2
GSM1820779	76	1	1	547	C1
GSM1820780	68	1	0	971	C2
GSM1820781	67	1	1	599	C1
GSM1820782	77	0	1	535	C1
GSM1820783	66	1	1	59	C1
GSM1820784	59	1	1	210	C1
GSM1820785	54	1	0	698	C2
GSM1820786	63	1	1	226	C1
GSM1820787	67	1	0	670	C2
GSM1820788	71	0	1	98	C1
GSM1820789	84	1	0	636	C2
GSM1820790	69	1	0	613	C2
GSM1820791	71	1	0	594	C2
GSM1820792	48	1	1	306	C2
GSM1820793	67	1	1	80	C1
GSM1820794	71	1	1	565	C2
GSM1820795	78	0	1	150	C2
GSM1820796	69	1	0	523	C2
GSM1820797	65	1	0	839	C2
GSM1820798	44	1	1	66	C2
GSM1820799	68	1	1	489	C1
GSM1820800	53	1	1	21	C1
GSM1820801	51	1	1	89	C2
GSM1820802	60	1	0	551	C2
GSM1820803	49	1	1	128	C2
GSM1820804	83	1	0	468	C1
GSM1820805	54	0	1	840	C2
GSM1820806	82	1	1	197	C1
GSM1820807	82	0	1	472	C1
GSM1820808	68	0	0	872	C2
GSM1820809	81	0	1	787	C1
GSM1820810	75	1	0	1054	C2
GSM1820811	74	1	0	1052	C2
GSM1820812	62	1	1	378	C2
GSM1820813	76	1	1	688	C1
GSM1820814	66	1	1	493	C2
GSM1820815	86	1	1	958	C1
GSM1820816	70	1	0	863	C2
GSM1820817	62	1	1	586	C1
GSM1820818	81	0	0	1105	C1
GSM1820819	70	1	1	1171	C2
GSM1820820	78	1	1	110	C2
GSM1820821	64	1	1	472	C2
GSM1820822	79	1	1	139	C2
GSM1820823	66	0	0	841	C2
GSM1820824	62	1	1	294	C1
GSM1820825	61	1	1	388	C1
GSM1820826	73	1	1	318	C2
GSM1820827	81	1	0	1104	C2
GSM1820828	68	0	0	1097	C2
GSM1820829	72	1	1	42	C1
GSM1820830	84	1	1	276	C1
GSM1820831	62	1	1	79	C2
GSM1820832	72	1	0	1027	C2
GSM1820833	55	1	1	557	C2
GSM1820834	40	1	0	660	C2
GSM1820835	72	1	1	144	C2
GSM1820836	73	1	1	271	C2
GSM1820837	62	1	0	619	C2
GSM1820838	79	0	0	859	C2
GSM1820839	88	0	0	583	C1
GSM1820840	62	0	1	731	C2
GSM1820841	41	1	0	549	C2
GSM1820842	59	1	0	487	C2
GSM1820843	75	1	1	540	C1
GSM1820844	79	1	1	282	C1
GSM1820845	60	1	0	459	C2
GSM1820846	71	1	1	426	C1
GSM1820847	76	1	1	401	C1
GSM1820848	71	1	0	383	C1
GSM1820849	62	1	1	369	C1
GSM1820850	55	1	1	244	C1
GSM1820851	74	0	1	1443	C2
GSM1820852	64	1	0	587	C2
GSM1820853	64	1	1	214	C2
GSM1820854	58	1	0	362	C2
GSM1820855	67	1	1	468	C1
GSM1820856	63	1	1	676	C2
GSM1820857	60	1	0	1422	C2
GSM1820858	64	1	1	1472	C1
GSM1820859	71	1	0	433	C2
GSM1820860	76	0	0	1271	C2
GSM1820861	66	1	1	1281	C1
GSM1820862	65	1	0	699	C1
GSM1820863	68	1	1	351	C1
GSM1820864	77	1	0	328	C2
GSM1820865	53	1	0	529	C1
GSM1820866	64	1	0	846	C2
GSM1820867	75	1	0	699	C2
GSM1820868	62	0	0	419	C2
GSM1820869	52	1	0	1253	C2
GSM1820870	72	1	0	697	C2
GSM1820871	72	0	0	1240	C2
GSM1820872	71	1	1	1394	C2
GSM1820873	51	1	0	1439	C2
GSM1820874	60	1	1	637	C1
GSM1820875	66	1	0	918	C1
GSM1820876	74	1	0	1817	C2
GSM1820877	64	1	1	299	C2
GSM1820878	69	1	0	377	C1
GSM1820879	80	0	0	546	C1
GSM1820880	74	1	0	758	C2
GSM1820881	73	1	1	541	C2
GSM1820882	75	1	1	93	C1
GSM1820883	69	0	0	902	C2
GSM1820884	78	1	1	395	C2
GSM1820885	87	1	0	665	C1
GSM1820886	61	0	0	1246	C2
GSM1820887	79	0	1	220	C1
GSM1820888	71	1	1	214	C1
GSM1820889	64	1	0	348	C1
GSM1820890	52	1	1	200	C2
GSM1820891	60	1	1	253	C2
GSM1820892	62	1	0	825	C2
GSM1820893	77	0	0	389	C1
GSM1820894	73	1	0	370	C2
GSM1820895	65	0	0	559	C1
GSM1820896	76	1	0	574	C1
GSM1820897	51	1	0	1405	C1
GSM1820898	78	1	1	297	C2
GSM1820899	53	0	0	243	C2
GSM1820900	80	1	0	238	C1
GSM1820901	69	1	0	237	C2
GSM1820902	77	1	1	306	C2
GSM1820903	69	1	1	1038	C2
GSM1820904	69	0	0	895	C2
GSM1820905	63	1	0	1793	C2
GSM1820906	65	1	0	384	C2
GSM1820907	68	1	0	420	C2
GSM1820908	53	1	0	1491	C2
GSM1820909	82	1	1	236	C1
GSM1820910	79	1	0	1098	C1
GSM1820911	67	0	1	340	C1
GSM1820912	79	1	1	728	C1
GSM1820913	80	1	1	133	C1
GSM1820914	68	1	0	939	C2
