# Supplementary material for: The identification of metabolism-related subtypes and potential treatments for idiopathic pulmonary fibrosis
Source: Front Pharmacol. 2023 May 18;14:1173961. doi: 10.3389/fphar.2023.1173961 (PMC10232787; doi:10.3389/fphar.2023.1173961)
Supplement: Supplementary file 2 [file Table4.xls]

## Sheet: metabolism_ssgsea
	GSM1820739	GSM1820740	GSM1820741	GSM1820742	GSM1820743	GSM1820744	GSM1820745	GSM1820746	GSM1820747	GSM1820748	GSM1820749	GSM1820750	GSM1820751	GSM1820752	GSM1820753	GSM1820754	GSM1820755	GSM1820756	GSM1820757	GSM1820758	GSM1820759	GSM1820760	GSM1820761	GSM1820762	GSM1820763	GSM1820764	GSM1820765	GSM1820766	GSM1820767	GSM1820768	GSM1820769	GSM1820770	GSM1820771	GSM1820772	GSM1820773	GSM1820774	GSM1820775	GSM1820776	GSM1820777	GSM1820778	GSM1820779	GSM1820780	GSM1820781	GSM1820782	GSM1820783	GSM1820784	GSM1820785	GSM1820786	GSM1820787
KEGG_ALANINE_ASPARTATE_AND_GLUTAMATE_METABOLISM	0.601017	0.620784	0.667319	0.676965	0.667154	0.656323	0.633975	0.627393	0.633235	0.664342	0.660437	0.638239	0.679924	0.623968	0.637866	0.627638	0.63306	0.646204	0.662823	0.638198	0.628969	0.649133	0.640145	0.670495	0.62633	0.63594	0.618191	0.610141	0.640806	0.639673	0.628208	0.677983	0.659573	0.663238	0.67652	0.621535	0.627688	0.619742	0.632829	0.674606	0.551819	0.611031	0.662462	0.616032	0.66404	0.619302	0.63489	0.648737	0.64229
KEGG_ALPHA_LINOLENIC_ACID_METABOLISM	0.348532	0.50936	0.329626	0.287463	0.32836	0.345363	0.339242	0.385289	0.392805	0.378495	0.360389	0.413098	0.332957	0.382727	0.421432	0.380077	0.30945	0.36387	0.356427	0.285962	0.38177	0.343488	0.301223	0.359935	0.412603	0.32481	0.302639	0.395611	0.321139	0.317891	0.335609	0.407716	0.392652	0.332543	0.346935	0.373283	0.374785	0.323416	0.388041	0.35462	0.383653	0.325755	0.354313	0.358241	0.401759	0.544351	0.338649	0.40501	0.337262
KEGG_AMINO_SUGAR_AND_NUCLEOTIDE_SUGAR_METABOLISM	0.881687	0.925452	0.923189	0.958646	0.940899	0.938784	0.893158	0.907904	0.918524	0.944413	0.929235	0.929644	0.943367	0.900237	0.885775	0.927692	0.889965	0.938769	0.896897	0.914556	0.891954	0.885364	0.908119	0.951144	0.89879	0.889959	0.938262	0.936436	0.884811	0.924837	0.940715	0.935147	0.91278	0.949813	0.948125	0.908175	0.909455	0.921195	0.90279	0.96809	0.809744	0.888805	0.920964	0.910974	0.860541	0.889275	0.924733	0.921818	0.941815
KEGG_ARACHIDONIC_ACID_METABOLISM	0.409077	0.43741	0.396235	0.39937	0.41302	0.381636	0.410563	0.377718	0.377755	0.421177	0.379099	0.417609	0.407681	0.375437	0.419841	0.379584	0.412728	0.376313	0.389367	0.384879	0.377216	0.410564	0.419397	0.403953	0.425361	0.394122	0.390431	0.425196	0.377722	0.405193	0.411892	0.417466	0.425807	0.389431	0.418519	0.437939	0.415167	0.35144	0.392555	0.406177	0.416897	0.391793	0.4325	0.428107	0.400865	0.475879	0.393365	0.417305	0.366131
KEGG_ARGININE_AND_PROLINE_METABOLISM	0.699467	0.697995	0.689401	0.732061	0.69838	0.707923	0.68503	0.674853	0.686953	0.717439	0.698823	0.711929	0.705208	0.703551	0.687556	0.667534	0.687398	0.697327	0.687875	0.678554	0.661661	0.683878	0.714469	0.716838	0.69237	0.669972	0.742747	0.689442	0.678175	0.698273	0.672296	0.722898	0.687666	0.735734	0.72568	0.716507	0.717089	0.687693	0.681312	0.696031	0.604466	0.677679	0.694866	0.668605	0.742303	0.706077	0.697881	0.72076	0.665137
KEGG_ASCORBATE_AND_ALDARATE_METABOLISM	0.509118	0.420154	0.492016	0.47486	0.456071	0.43731	0.480683	0.434643	0.406091	0.430162	0.408659	0.530083	0.461795	0.432284	0.390701	0.465235	0.528253	0.398499	0.407548	0.440443	0.430661	0.435555	0.419694	0.416034	0.473056	0.368989	0.54164	0.432678	0.455709	0.439695	0.378022	0.458316	0.377749	0.468935	0.473199	0.42933	0.437515	0.411691	0.480884	0.446275	0.278774	0.448909	0.382723	0.526008	0.484222	0.431329	0.406297	0.426397	0.3788
KEGG_BETA_ALANINE_METABOLISM	0.757604	0.802724	0.764783	0.784774	0.788634	0.785633	0.790678	0.76627	0.756818	0.803251	0.760894	0.79629	0.770823	0.77113	0.711298	0.775937	0.803856	0.789558	0.736842	0.763277	0.779365	0.784804	0.764273	0.77195	0.799786	0.708543	0.79073	0.782804	0.775803	0.769357	0.730266	0.780786	0.727589	0.743395	0.763711	0.71511	0.737193	0.790641	0.754543	0.772338	0.569063	0.72907	0.757506	0.762963	0.712387	0.745825	0.780349	0.775628	0.74344
KEGG_BUTANOATE_METABOLISM	0.670166	0.721146	0.679985	0.67984	0.690722	0.705877	0.665959	0.664453	0.681928	0.703986	0.669756	0.684425	0.682486	0.659463	0.649778	0.702459	0.669561	0.672731	0.669208	0.66878	0.64155	0.682825	0.65356	0.680136	0.685105	0.632226	0.659778	0.656771	0.64382	0.664795	0.664643	0.655463	0.660139	0.675439	0.681935	0.629831	0.673829	0.664316	0.671488	0.675338	0.587661	0.650573	0.614921	0.661135	0.662414	0.706019	0.669885	0.667783	0.66722
KEGG_CYSTEINE_AND_METHIONINE_METABOLISM	0.79244	0.813008	0.834017	0.87274	0.858117	0.846712	0.828585	0.828266	0.837163	0.853604	0.84144	0.819555	0.813878	0.827938	0.82587	0.829892	0.854051	0.858645	0.841413	0.832158	0.832746	0.815365	0.852752	0.856978	0.83089	0.844465	0.874001	0.871186	0.840146	0.832831	0.867353	0.853595	0.832424	0.863153	0.827559	0.827457	0.832978	0.85486	0.80798	0.87443	0.729775	0.853216	0.850278	0.770338	0.806947	0.850188	0.857663	0.85343	0.868398
KEGG_DRUG_METABOLISM_CYTOCHROME_P450	0.306207	0.275327	0.292193	0.309284	0.286741	0.285309	0.353937	0.275069	0.276224	0.301721	0.306267	0.319409	0.359196	0.294298	0.273222	0.381508	0.314351	0.322111	0.263156	0.334766	0.289699	0.344097	0.287944	0.327241	0.320303	0.272059	0.373552	0.357341	0.264666	0.275854	0.291335	0.359105	0.358895	0.315855	0.351035	0.284114	0.396472	0.316202	0.331456	0.272206	0.228518	0.323294	0.281357	0.301666	0.304678	0.215055	0.28188	0.268029	0.35085
KEGG_DRUG_METABOLISM_OTHER_ENZYMES	0.58154	0.594677	0.593484	0.613642	0.602639	0.604316	0.553481	0.559922	0.569732	0.614702	0.60437	0.568441	0.606505	0.525574	0.554231	0.616719	0.611608	0.591094	0.570253	0.582598	0.569767	0.573531	0.59913	0.60873	0.585159	0.572883	0.672431	0.622855	0.532816	0.598788	0.581599	0.623268	0.56924	0.625975	0.615901	0.57628	0.627593	0.572542	0.617738	0.633282	0.559023	0.589768	0.597932	0.551082	0.608296	0.575955	0.616341	0.617226	0.60785
KEGG_ETHER_LIPID_METABOLISM	0.478864	0.559212	0.468427	0.483054	0.470022	0.47996	0.461861	0.460927	0.471347	0.511864	0.474273	0.504085	0.458624	0.480329	0.495656	0.493537	0.47325	0.479887	0.47053	0.466462	0.505731	0.455225	0.488666	0.487571	0.500016	0.445167	0.446632	0.47848	0.454497	0.471047	0.4927	0.486979	0.452366	0.491163	0.464806	0.475447	0.476574	0.48297	0.47384	0.486809	0.457031	0.470978	0.469179	0.461061	0.451495	0.581175	0.48985	0.530389	0.463395
KEGG_FATTY_ACID_METABOLISM	0.753242	0.799909	0.796673	0.778241	0.785606	0.759659	0.794912	0.766328	0.777381	0.790252	0.769781	0.819757	0.787694	0.77062	0.757406	0.824424	0.78605	0.785226	0.767242	0.788017	0.775257	0.79919	0.755842	0.770739	0.77806	0.742934	0.743817	0.764969	0.770136	0.754447	0.768488	0.784957	0.766071	0.781111	0.781093	0.755972	0.763738	0.778347	0.761423	0.785648	0.665352	0.779893	0.741465	0.789882	0.757117	0.758677	0.79723	0.751969	0.767
KEGG_FRUCTOSE_AND_MANNOSE_METABOLISM	0.78497	0.811493	0.807187	0.83972	0.852835	0.848256	0.787119	0.845406	0.828433	0.861213	0.833421	0.773362	0.855839	0.819201	0.803626	0.827715	0.773187	0.832622	0.824134	0.807179	0.797382	0.815614	0.841145	0.849914	0.778176	0.790953	0.840365	0.855624	0.8053	0.85063	0.831566	0.847816	0.872367	0.835351	0.839947	0.792805	0.805982	0.846636	0.752327	0.831258	0.740563	0.830399	0.808114	0.802802	0.693814	0.773281	0.848409	0.761916	0.838412
KEGG_GALACTOSE_METABOLISM	0.898127	0.918835	0.882312	0.901368	0.901303	0.912588	0.85491	0.88175	0.881528	0.914048	0.904508	0.899377	0.925505	0.889438	0.856803	0.886287	0.87487	0.909294	0.876094	0.870882	0.886212	0.885113	0.893275	0.919266	0.905258	0.856943	0.922193	0.919258	0.879331	0.919199	0.8921	0.916152	0.921098	0.902742	0.915233	0.882989	0.875078	0.914695	0.842566	0.915858	0.810627	0.910926	0.899441	0.922034	0.771463	0.886291	0.875316	0.83378	0.91282
KEGG_GLUTATHIONE_METABOLISM	0.846958	0.852023	0.838453	0.86442	0.858749	0.85554	0.8964	0.864649	0.860822	0.877586	0.882471	0.837952	0.875815	0.861201	0.870224	0.893452	0.795732	0.905738	0.831792	0.885793	0.860395	0.851346	0.864786	0.878337	0.857534	0.829948	0.865477	0.904242	0.80738	0.839025	0.871084	0.876142	0.895645	0.851001	0.889733	0.845276	0.914476	0.878459	0.838272	0.862328	0.73469	0.856325	0.865477	0.837352	0.753218	0.82623	0.857807	0.82981	0.873385
KEGG_GLYCEROPHOSPHOLIPID_METABOLISM	0.681288	0.697377	0.664444	0.692957	0.681107	0.692705	0.687223	0.705871	0.694709	0.720963	0.698705	0.699135	0.695969	0.704224	0.705185	0.705067	0.66247	0.717895	0.697426	0.679996	0.703916	0.673196	0.709199	0.711414	0.682272	0.662609	0.669714	0.712081	0.696391	0.696485	0.701343	0.695713	0.720106	0.678256	0.701929	0.696174	0.661073	0.694792	0.683501	0.701732	0.696949	0.672465	0.701657	0.69584	0.643982	0.702744	0.698065	0.685142	0.686328
KEGG_GLYCEROLIPID_METABOLISM	0.722439	0.689942	0.721672	0.735213	0.711446	0.739974	0.741272	0.741708	0.747426	0.774321	0.757604	0.745874	0.740659	0.744619	0.727715	0.756425	0.701083	0.780763	0.749051	0.687857	0.707384	0.738969	0.745187	0.755782	0.725495	0.69032	0.73834	0.757446	0.752456	0.751097	0.73151	0.720267	0.733505	0.728611	0.757065	0.716428	0.725126	0.72468	0.744485	0.734616	0.627559	0.741242	0.724707	0.746007	0.738314	0.681661	0.756959	0.73261	0.764653
KEGG_GLYCINE_SERINE_AND_THREONINE_METABOLISM	0.366259	0.403684	0.453771	0.455926	0.475767	0.407959	0.422784	0.404016	0.419209	0.51527	0.472614	0.426124	0.425422	0.437753	0.438611	0.422438	0.474273	0.483015	0.430746	0.44217	0.398867	0.385733	0.46645	0.514805	0.497224	0.418453	0.505105	0.47239	0.389413	0.478934	0.500532	0.45703	0.487279	0.467431	0.4703	0.402171	0.484624	0.430025	0.408583	0.472068	0.324099	0.485139	0.455911	0.394753	0.496383	0.387145	0.504167	0.458903	0.480091
KEGG_GLYOXYLATE_AND_DICARBOXYLATE_METABOLISM	0.909492	0.890585	0.904501	0.88664	0.911284	0.932701	0.895018	0.933765	0.919239	0.945247	0.934461	0.906024	0.937346	0.905963	0.882625	0.9263	0.905187	0.914944	0.924808	0.890009	0.869382	0.916313	0.909422	0.935397	0.921849	0.895911	0.946555	0.970769	0.888884	0.94905	0.884824	0.948276	0.957762	0.920218	0.930029	0.902351	0.945763	0.921851	0.895695	0.922864	0.709731	0.923531	0.911652	0.929905	0.882605	0.829849	0.9325	0.885983	0.942127
KEGG_HISTIDINE_METABOLISM	0.493219	0.481909	0.468273	0.494631	0.473594	0.473952	0.491194	0.434549	0.463689	0.504004	0.474091	0.496501	0.484155	0.433485	0.435842	0.430147	0.456347	0.497959	0.439675	0.49179	0.479719	0.461416	0.502764	0.526334	0.411739	0.419293	0.504689	0.47758	0.445207	0.481966	0.4444	0.476455	0.423875	0.482874	0.458151	0.452581	0.467213	0.457172	0.4369	0.463963	0.473164	0.443725	0.428802	0.43713	0.525271	0.435459	0.462771	0.493132	0.43311
KEGG_INOSITOL_PHOSPHATE_METABOLISM	0.595397	0.567478	0.592851	0.607684	0.595899	0.606751	0.602523	0.632131	0.629293	0.632307	0.614639	0.582174	0.613192	0.602893	0.629858	0.612204	0.57702	0.613381	0.617339	0.590294	0.608542	0.612678	0.616118	0.619663	0.58304	0.618941	0.576969	0.586533	0.561127	0.598486	0.640547	0.565987	0.59412	0.58351	0.598722	0.590245	0.539007	0.621313	0.580073	0.61101	0.654176	0.604863	0.606683	0.562912	0.53997	0.563053	0.62612	0.607503	0.631449
KEGG_LINOLEIC_ACID_METABOLISM	0.0856379	0.196726	0.0498261	0.00172429	0.0417414	0.0680688	0.034885	0.0717921	0.0640696	0.0607595	0.0452281	0.150598	0.0906195	0.0627264	0.0869575	0.136194	0.0934545	0.0466518	0.0599753	0.0443231	0.0620973	0.0525241	0	0.0751194	0.146983	0.0514294	0.0530328	0.130608	0.0671472	0.0304053	0.0443677	0.123216	0.0923464	0.0468563	0.0632183	0.0625616	0.0988529	0.0126364	0.129045	0.0953944	0.115204	0.0860218	0.0708415	0.0309618	0.106883	0.224524	0.0393644	0.0757328	0.0301423
KEGG_METABOLISM_OF_XENOBIOTICS_BY_CYTOCHROME_P450	0.406856	0.393513	0.384718	0.416222	0.39195	0.388542	0.457368	0.397649	0.37531	0.385111	0.410735	0.383927	0.439604	0.397667	0.385318	0.481935	0.385563	0.421774	0.365378	0.438216	0.384866	0.411397	0.380977	0.431294	0.436402	0.371063	0.450129	0.450909	0.356187	0.396994	0.396895	0.449857	0.448519	0.415705	0.437096	0.390576	0.501643	0.420252	0.401932	0.357481	0.285442	0.428404	0.410366	0.390983	0.376731	0.336393	0.381538	0.362606	0.40519
KEGG_NICOTINATE_AND_NICOTINAMIDE_METABOLISM	0.517616	0.613531	0.604301	0.612254	0.5744	0.552431	0.547554	0.572451	0.575828	0.610042	0.517671	0.705869	0.649067	0.587984	0.577963	0.578241	0.580574	0.580723	0.576408	0.513059	0.593971	0.587609	0.542524	0.558934	0.566925	0.558887	0.553523	0.560457	0.604624	0.606628	0.554797	0.594125	0.648583	0.549164	0.56291	0.555849	0.58033	0.518906	0.565551	0.553682	0.529763	0.596671	0.547866	0.568256	0.505884	0.533513	0.563896	0.524338	0.542916
KEGG_NITROGEN_METABOLISM	0.424798	0.39594	0.397789	0.419804	0.381688	0.450655	0.468372	0.413916	0.414239	0.406673	0.445145	0.409284	0.404704	0.402257	0.414728	0.391427	0.424491	0.41692	0.439247	0.417642	0.406394	0.399399	0.386476	0.471804	0.389959	0.388448	0.412112	0.399444	0.429751	0.411963	0.435761	0.391096	0.457305	0.384453	0.398209	0.377798	0.413758	0.387225	0.413985	0.414515	0.537821	0.418294	0.375318	0.479391	0.441783	0.399673	0.40842	0.390174	0.45016
KEGG_PHENYLALANINE_METABOLISM	0.6528	0.635954	0.605409	0.713021	0.656031	0.585134	0.640779	0.619855	0.588888	0.62876	0.643611	0.623664	0.649346	0.626164	0.602328	0.608114	0.652653	0.646661	0.581652	0.630566	0.609716	0.600362	0.685825	0.672214	0.665197	0.603613	0.669435	0.65356	0.636721	0.654667	0.631949	0.656036	0.697831	0.620729	0.639579	0.630892	0.636183	0.568417	0.576631	0.643866	0.507289	0.614275	0.684041	0.700328	0.669408	0.62369	0.612722	0.649844	0.58791
KEGG_PORPHYRIN_AND_CHLOROPHYLL_METABOLISM	0.683763	0.672232	0.70029	0.704845	0.673519	0.720864	0.680327	0.701051	0.678398	0.730428	0.712564	0.718351	0.729498	0.682515	0.69776	0.703922	0.738376	0.689791	0.680218	0.660941	0.643469	0.64307	0.678345	0.72089	0.711634	0.668491	0.755883	0.713692	0.648795	0.720788	0.699399	0.722381	0.722653	0.682349	0.730438	0.655561	0.784694	0.69367	0.742561	0.728592	0.675428	0.693418	0.677382	0.702876	0.696811	0.657123	0.695112	0.724346	0.708217
KEGG_PROPANOATE_METABOLISM	0.93565	0.962028	0.960127	0.954128	0.942869	0.950112	0.964051	0.943655	0.945579	0.973962	0.912215	0.979448	0.924359	0.940557	0.917331	0.954665	0.957044	0.930501	0.95843	0.932787	0.91874	0.960597	0.913216	0.922134	0.928867	0.867453	0.921717	0.941403	0.883603	0.918143	0.887892	0.930474	0.892143	0.958875	0.935439	0.884059	0.976031	0.941058	0.935932	0.91275	0.764422	0.944583	0.866677	0.910661	0.938336	0.850416	0.956739	0.953603	0.931062
KEGG_PURINE_METABOLISM	0.647138	0.67482	0.676871	0.678081	0.697712	0.692799	0.667566	0.672706	0.674566	0.699052	0.685282	0.690787	0.687233	0.668843	0.669642	0.68429	0.662083	0.68886	0.668878	0.674755	0.66115	0.670192	0.678166	0.699558	0.647562	0.671248	0.703825	0.690041	0.644178	0.690237	0.677915	0.688992	0.690279	0.694507	0.699891	0.664113	0.70168	0.68667	0.685765	0.697154	0.659413	0.667756	0.6676	0.655363	0.685931	0.654568	0.697078	0.695068	0.686748
KEGG_PYRIMIDINE_METABOLISM	0.809063	0.844111	0.836892	0.848833	0.860786	0.87147	0.811198	0.832679	0.836159	0.869838	0.863734	0.845187	0.863727	0.817088	0.81272	0.853155	0.812914	0.873681	0.826048	0.832788	0.836123	0.810042	0.839664	0.878223	0.810538	0.820317	0.860647	0.870854	0.796007	0.859902	0.851145	0.864056	0.846612	0.864582	0.869076	0.824193	0.86348	0.8618	0.823815	0.878108	0.817656	0.833002	0.831344	0.792965	0.798505	0.794936	0.877983	0.854599	0.870549
KEGG_PYRUVATE_METABOLISM	0.910402	0.948979	0.932174	0.939086	0.940547	0.965217	0.904438	0.965442	0.935517	0.959603	0.946168	0.950667	0.930464	0.92287	0.907024	0.950928	0.942039	0.937942	0.93461	0.918471	0.896275	0.886842	0.911996	0.941742	0.943562	0.881608	0.939749	0.96165	0.890316	0.943299	0.920812	0.946534	0.923251	0.946401	0.945986	0.918032	0.942828	0.945687	0.932276	0.935795	0.752825	0.930942	0.911709	0.924265	0.919863	0.907371	0.945842	0.950844	0.94712
KEGG_RETINOL_METABOLISM	0.23284	0.242268	0.246761	0.263847	0.229019	0.241346	0.267609	0.222985	0.208968	0.252962	0.25494	0.266732	0.274783	0.228289	0.189932	0.314409	0.318254	0.228551	0.231158	0.2227	0.206792	0.293435	0.246034	0.277772	0.291789	0.227188	0.301931	0.275338	0.214797	0.257714	0.23313	0.262741	0.261487	0.26956	0.290255	0.22817	0.296172	0.230077	0.276697	0.258532	0.167464	0.286571	0.205598	0.290601	0.225771	0.190499	0.212476	0.209027	0.242747
KEGG_RIBOFLAVIN_METABOLISM	0.653209	0.707379	0.721341	0.65558	0.770314	0.740601	0.661263	0.677674	0.747045	0.683398	0.662363	0.731465	0.672849	0.679313	0.654279	0.717697	0.660739	0.678864	0.688627	0.703824	0.631213	0.660017	0.636618	0.697419	0.637125	0.647796	0.701376	0.648602	0.690011	0.662723	0.652534	0.686816	0.761614	0.720847	0.706374	0.653896	0.686054	0.692842	0.716552	0.724376	0.598643	0.668276	0.644309	0.640736	0.665415	0.632638	0.667793	0.662477	0.712202
KEGG_SELENOAMINO_ACID_METABOLISM	0.677318	0.692579	0.720207	0.749676	0.75933	0.71135	0.706712	0.707536	0.717214	0.773419	0.734996	0.719552	0.707344	0.698631	0.703214	0.729837	0.706746	0.747754	0.692506	0.757164	0.70398	0.698546	0.736559	0.739646	0.68794	0.703572	0.757927	0.756335	0.69798	0.723205	0.724862	0.726808	0.716528	0.72589	0.702885	0.702585	0.743816	0.718017	0.681689	0.755934	0.59101	0.74008	0.735925	0.669352	0.675457	0.731542	0.748944	0.729339	0.733579
KEGG_SPHINGOLIPID_METABOLISM	0.759777	0.717198	0.743193	0.734609	0.745989	0.73618	0.740195	0.745796	0.72628	0.73543	0.72439	0.754762	0.742204	0.734258	0.716912	0.744075	0.72825	0.730606	0.726489	0.75374	0.744941	0.760561	0.748337	0.749807	0.754079	0.720546	0.741005	0.738654	0.832271	0.769584	0.725139	0.745451	0.753815	0.739611	0.73341	0.740015	0.718345	0.740387	0.71774	0.761781	0.66146	0.741954	0.731571	0.75698	0.686797	0.720741	0.723119	0.720459	0.736907
KEGG_STARCH_AND_SUCROSE_METABOLISM	0.5441	0.593779	0.59398	0.585102	0.605659	0.623393	0.541261	0.56367	0.608587	0.572436	0.578427	0.608726	0.573013	0.568954	0.54541	0.59523	0.564849	0.551427	0.559467	0.547982	0.567826	0.561701	0.547692	0.570203	0.531132	0.534922	0.612853	0.585071	0.540713	0.585465	0.56686	0.566276	0.574231	0.580828	0.595187	0.571222	0.543188	0.573514	0.643466	0.616033	0.580236	0.608861	0.574749	0.559442	0.637072	0.53008	0.552601	0.611484	0.600788
KEGG_SULFUR_METABOLISM	0.834942	0.852452	0.838962	0.873332	0.871861	0.849795	0.844181	0.865403	0.848833	0.870867	0.84819	0.84136	0.834698	0.836759	0.847183	0.811726	0.868333	0.871028	0.80317	0.861742	0.818233	0.866001	0.857188	0.895451	0.820105	0.81741	0.845525	0.87736	0.867809	0.867889	0.865321	0.872425	0.840789	0.852774	0.850229	0.824985	0.862606	0.847767	0.833905	0.856207	0.752192	0.817303	0.883959	0.813564	0.765314	0.884349	0.875409	0.872872	0.819231
KEGG_TAURINE_AND_HYPOTAURINE_METABOLISM	0.245411	0.204121	0.199526	0.160432	0.227778	0.168729	0.131503	0.199196	0.159339	0.202905	0.180673	0.22692	0.160219	0.170323	0.2587	0.189888	0.256315	0.174314	0.205203	0.2294	0.269087	0.255691	0.220621	0.220931	0.343989	0.232944	0.30955	0.260107	0.286912	0.215776	0.211922	0.167261	0.320325	0.22621	0.207377	0.292248	0.201387	0.163946	0.184437	0.237643	0.145402	0.154211	0.322311	0.286749	0.18063	0.326829	0.15538	0.168941	0.204791
KEGG_TRYPTOPHAN_METABOLISM	0.611101	0.61725	0.604965	0.693537	0.620571	0.587632	0.655111	0.597105	0.600922	0.633407	0.582614	0.596098	0.622051	0.583524	0.586811	0.611214	0.625064	0.591598	0.615713	0.660722	0.634682	0.612787	0.621494	0.58837	0.602206	0.61983	0.613515	0.64175	0.636366	0.605082	0.610145	0.600256	0.570935	0.650031	0.605596	0.587183	0.613365	0.576239	0.561487	0.609587	0.425368	0.605726	0.563778	0.595224	0.607486	0.630807	0.607377	0.628171	0.578221
KEGG_TYROSINE_METABOLISM	0.449992	0.430103	0.414928	0.462555	0.450859	0.408094	0.445784	0.416989	0.40437	0.460076	0.444722	0.446956	0.474665	0.407697	0.373577	0.451821	0.422769	0.452179	0.380709	0.443669	0.433084	0.443963	0.445473	0.466039	0.436878	0.427877	0.466868	0.463361	0.392375	0.460962	0.429075	0.471909	0.470754	0.478235	0.4493	0.429636	0.52907	0.417961	0.436634	0.442231	0.362376	0.423131	0.44515	0.492014	0.466937	0.409147	0.427067	0.459189	0.415022
[truncated: 127 more columns]
