# Supplementary material for: The identification of metabolism-related subtypes and potential treatments for idiopathic pulmonary fibrosis
Source: Front Pharmacol. 2023 May 18;14:1173961. doi: 10.3389/fphar.2023.1173961 (PMC10232787; doi:10.3389/fphar.2023.1173961)
Supplement: Supplementary file 3 [file Table2.XLS]

## Sheet: GSE93606 clinical data
	time	survival_status	age	sex	Subtype
GSM2458583	300	1	57	female	C2
GSM2458586	1020	0	65	male	C2
GSM2458591	360	1	75	male	C1
GSM2458596	90	1	58	male	C2
GSM2458597	330	1	75	male	C2
GSM2458600	990	0	63	male	C2
GSM2458605	330	1	69	male	C1
GSM2458607	210	1	61	male	C2
GSM2458609	90	1	75	male	C1
GSM2458611	960	0	73	male	C2
GSM2458616	960	0	72	male	C1
GSM2458619	960	1	60	male	C2
GSM2458624	660	1	63	male	C2
GSM2458629	60	1	66	male	C1
GSM2458630	960	0	63	female	C2
GSM2458635	960	0	58	male	C2
GSM2458639	930	0	80	male	C2
GSM2458642	90	1	56	male	C1
GSM2458645	570	1	65	female	C2
GSM2458649	900	1	68	male	C1
GSM2458653	900	0	68	male	C2
GSM2458657	240	1	62	male	C1
GSM2458659	270	1	77	male	C1
GSM2458664	870	1	68	male	C1
GSM2458669	870	1	68	male	C2
GSM2458674	840	0	63	male	C2
GSM2458679	870	1	80	female	C1
GSM2458680	870	0	59	female	C2
GSM2458683	330	1	71	female	C1
GSM2458685	720	1	63	male	C1
GSM2458688	330	1	64	male	C1
GSM2458692	450	1	76	male	C1
GSM2458697	270	1	75	male	C1
GSM2458701	840	1	64	male	C2
GSM2458706	660	1	55	female	C1
GSM2458709	810	0	69	male	C2
GSM2458712	150	1	84	female	C1
GSM2458714	900	1	68	male	C1
GSM2458716	510	1	84	female	C1
GSM2458719	780	0	51	male	C1
GSM2458720	630	1	82	female	C2
GSM2458721	210	1	69	male	C1
GSM2458722	750	0	57	male	C1
GSM2458723	750	1	68	male	C1
GSM2458724	720	1	76	female	C2
GSM2458725	720	0	64	male	C2
GSM2458726	690	0	77	female	C1
GSM2458727	450	1	70	male	C2
GSM2458728	690	0	73	male	C2
GSM2458729	660	0	50	male	C1
GSM2458730	810	0	76	female	C1
GSM2458731	510	0	56	female	C2
GSM2458732	480	1	66	female	C1
GSM2458733	450	0	70	female	C2
GSM2458734	390	0	64	female	C2
GSM2458735	390	0	65	female	C2
GSM2458736	390	0	69	female	C2
