# Supplementary material for: The identification of metabolism-related subtypes and potential treatments for idiopathic pulmonary fibrosis
Source: Front Pharmacol. 2023 May 18;14:1173961. doi: 10.3389/fphar.2023.1173961 (PMC10232787; doi:10.3389/fphar.2023.1173961)
Supplement: Supplementary file 4 [file Table5.xls]

## Sheet: Genes in turquoise module
	gene
1	GFPT1
2	NIT2
3	PLA2G6
4	FPGT
5	PGM2
6	CBR1
7	CYP2U1
8	LAP3
9	OAT
10	SAT1
11	ACAT1
12	HADH
13	AHCYL2
14	ENOPH1
15	TRDMT1
16	ADH5
17	ALDH3A1
18	GUSB
19	HPRT1
20	NAT1
21	TPMT
22	UMPS
23	ACAA2
24	MTMR2
25	B4GALT1
26	GANC
27	GCLC
28	GGCT
29	RRM1
30	AGPAT1
31	CDS2
32	CRLS1
33	GPD1L
34	LCLAT1
35	PHOSPHO1
36	CEL
37	MDH1
38	MTHFD2
39	METTL6
40	OCRL
41	PIP4K2A
42	CA13
43	BLVRA
44	CPOX
45	MCEE
46	DCK
47	GMPR2
48	NUDT9
49	PDE8A
50	PDE9A
51	POLE2
52	POLR1B
53	POLR1C
54	POLR2J
55	POLR2K
56	POLR3GL
57	PRIM2
58	UPRT
59	DLAT
60	GLO1
61	ACP1
62	DEGS1
63	SGMS1
64	SPHK1
65	GBE1
66	GYS1
67	CHST13
68	ADO
69	HAAO
