# Supplementary material for: The identification of metabolism-related subtypes and potential treatments for idiopathic pulmonary fibrosis
Source: Front Pharmacol. 2023 May 18;14:1173961. doi: 10.3389/fphar.2023.1173961 (PMC10232787; doi:10.3389/fphar.2023.1173961)
Supplement: Supplementary file 5 [file Table3.xls]

## Sheet: ssgsea score of validation coho
	GSM2458583	GSM2458586	GSM2458591	GSM2458596	GSM2458597	GSM2458600	GSM2458605	GSM2458607	GSM2458609	GSM2458611	GSM2458616	GSM2458619	GSM2458624	GSM2458629	GSM2458630	GSM2458635	GSM2458639	GSM2458642	GSM2458645	GSM2458649	GSM2458653	GSM2458657	GSM2458659	GSM2458664	GSM2458669	GSM2458674	GSM2458679	GSM2458680	GSM2458683	GSM2458685	GSM2458688	GSM2458692	GSM2458697	GSM2458701	GSM2458706	GSM2458709	GSM2458712	GSM2458714	GSM2458716	GSM2458719	GSM2458720	GSM2458721	GSM2458722	GSM2458723	GSM2458724	GSM2458725	GSM2458726	GSM2458727	GSM2458728
KEGG_ALANINE_ASPARTATE_AND_GLUTAMATE_METABOLISM	0.496248	0.522471	0.528367	0.480502	0.479138	0.493849	0.483154	0.476701	0.476912	0.48677	0.408333	0.512136	0.490354	0.46398	0.492326	0.49728	0.455829	0.48158	0.48188	0.4691	0.487233	0.470851	0.450266	0.450743	0.481939	0.485113	0.450374	0.491087	0.480245	0.457887	0.465023	0.496414	0.449	0.470486	0.458032	0.486617	0.455028	0.378674	0.479432	0.466945	0.45395	0.484745	0.471202	0.481719	0.463136	0.450928	0.453721	0.532887	0.508008
KEGG_ALPHA_LINOLENIC_ACID_METABOLISM	0.342253	0.424228	0.390051	0.405174	0.405767	0.364447	0.390418	0.387032	0.379508	0.384532	0.475931	0.391789	0.414387	0.418763	0.367391	0.409154	0.380458	0.328958	0.367247	0.492249	0.379497	0.410134	0.477444	0.458944	0.390152	0.422778	0.411645	0.42691	0.439164	0.414126	0.375071	0.427743	0.490004	0.376332	0.40189	0.389245	0.42692	0.434676	0.461608	0.415144	0.434537	0.380498	0.434297	0.409862	0.346579	0.357622	0.400482	0.32818	0.349972
KEGG_AMINO_SUGAR_AND_NUCLEOTIDE_SUGAR_METABOLISM	0.931656	0.928277	0.974444	0.918497	0.946232	0.896347	0.905767	0.947227	0.91882	0.917336	0.863308	0.949786	0.902085	0.91541	0.922951	0.928623	0.885251	0.888589	0.914249	0.93303	0.918937	0.939064	0.939848	0.933993	0.888899	0.929821	0.916922	0.93277	0.9351	0.890846	0.908039	0.919566	0.90041	0.909037	0.910738	0.877526	0.950425	0.881057	0.930396	0.925524	0.914807	0.907985	0.895599	0.895086	0.894299	0.903094	0.912114	0.872398	0.921041
KEGG_ARACHIDONIC_ACID_METABOLISM	0.462747	0.491821	0.495568	0.500273	0.505886	0.446059	0.484003	0.452612	0.483991	0.470174	0.520557	0.440731	0.459554	0.490046	0.469516	0.492529	0.501369	0.461281	0.489708	0.483916	0.495612	0.483652	0.511088	0.489559	0.475231	0.4678	0.469144	0.468862	0.498073	0.504778	0.474743	0.514209	0.48805	0.469424	0.476852	0.457911	0.501875	0.520825	0.497909	0.475761	0.476306	0.495616	0.457838	0.487036	0.45683	0.489819	0.49499	0.416605	0.470398
KEGG_ARGININE_AND_PROLINE_METABOLISM	0.594184	0.594314	0.647623	0.591172	0.60757	0.595063	0.607897	0.603694	0.624521	0.60337	0.591563	0.611185	0.599488	0.598454	0.633273	0.606474	0.600709	0.599769	0.597782	0.595269	0.604565	0.588236	0.594137	0.606101	0.602521	0.600835	0.593262	0.620455	0.612856	0.570115	0.582866	0.599285	0.590168	0.608268	0.60341	0.592468	0.602324	0.606142	0.607692	0.600864	0.598363	0.59295	0.577013	0.592818	0.592054	0.555047	0.563942	0.597963	0.588958
KEGG_ASCORBATE_AND_ALDARATE_METABOLISM	0.379555	0.380623	0.281819	0.454895	0.377688	0.319387	0.252937	0.399006	0.285115	0.331815	0.336122	0.354309	0.329441	0.339502	0.459042	0.4232	0.313893	0.389087	0.426565	0.360435	0.442939	0.272626	0.32983	0.297937	0.375164	0.326032	0.322809	0.432941	0.358023	0.359335	0.350396	0.37976	0.30416	0.378972	0.372444	0.342303	0.399659	0.314573	0.411306	0.379405	0.423974	0.29926	0.37451	0.394339	0.364881	0.414327	0.337312	0.470016	0.403407
KEGG_BETA_ALANINE_METABOLISM	0.825484	0.811493	0.835899	0.80267	0.822924	0.784672	0.809638	0.848164	0.815438	0.829983	0.818107	0.808749	0.833318	0.82481	0.813223	0.819758	0.844605	0.820915	0.782441	0.826766	0.851258	0.813122	0.820438	0.818077	0.800054	0.803713	0.798803	0.810049	0.798256	0.816703	0.794659	0.841853	0.787056	0.876212	0.809641	0.826236	0.850662	0.780601	0.867733	0.853562	0.83848	0.816939	0.793801	0.797769	0.794858	0.851217	0.802447	0.871023	0.854216
KEGG_BUTANOATE_METABOLISM	0.585941	0.571908	0.569152	0.582734	0.574488	0.564758	0.517137	0.545181	0.519777	0.541972	0.502538	0.566716	0.566606	0.518116	0.576355	0.602315	0.564334	0.539093	0.539834	0.547834	0.566025	0.534734	0.533241	0.556996	0.566891	0.556985	0.521082	0.559989	0.538335	0.539719	0.551376	0.572519	0.538304	0.594808	0.546619	0.588827	0.547677	0.476494	0.576988	0.564452	0.565613	0.53978	0.565504	0.547178	0.541463	0.536136	0.525244	0.611143	0.615019
KEGG_CYSTEINE_AND_METHIONINE_METABOLISM	0.752954	0.74078	0.747551	0.743674	0.746471	0.736947	0.697019	0.755847	0.719047	0.745179	0.703832	0.736909	0.726468	0.733723	0.745566	0.722372	0.730929	0.709102	0.751891	0.740323	0.738542	0.720169	0.729776	0.712505	0.75063	0.728032	0.71728	0.751017	0.696169	0.709509	0.720806	0.736891	0.726885	0.753508	0.716218	0.733705	0.704417	0.708062	0.734901	0.760785	0.752917	0.733557	0.712632	0.74299	0.730473	0.729151	0.716011	0.728793	0.743897
KEGG_DRUG_METABOLISM_CYTOCHROME_P450	0.264387	0.202805	0.205039	0.274388	0.233018	0.173452	0.175981	0.233706	0.200835	0.23695	0.178436	0.2365	0.228479	0.183958	0.204682	0.196757	0.238371	0.167906	0.25358	0.164883	0.207444	0.20698	0.199238	0.200775	0.25849	0.186294	0.174856	0.261172	0.249474	0.169556	0.219754	0.218408	0.155068	0.208469	0.235926	0.162613	0.264699	0.216798	0.195852	0.140696	0.194609	0.159661	0.224439	0.189375	0.177542	0.193972	0.174221	0.257408	0.202735
KEGG_DRUG_METABOLISM_OTHER_ENZYMES	0.539349	0.517858	0.576617	0.540247	0.537925	0.483856	0.496416	0.53929	0.52196	0.527988	0.498174	0.539067	0.514024	0.515651	0.533276	0.50133	0.511093	0.509983	0.535218	0.543058	0.540861	0.514886	0.518055	0.473009	0.519341	0.536541	0.507353	0.550007	0.528704	0.494795	0.530731	0.525491	0.481615	0.504348	0.52475	0.490454	0.573001	0.500011	0.558271	0.50727	0.534306	0.483649	0.518679	0.536732	0.519787	0.551824	0.51602	0.51038	0.510723
KEGG_ETHER_LIPID_METABOLISM	0.573297	0.594039	0.591375	0.586306	0.616236	0.560352	0.58104	0.573752	0.573547	0.585886	0.600187	0.563498	0.589313	0.597791	0.581557	0.60519	0.551743	0.560071	0.584557	0.621459	0.591863	0.595252	0.6245	0.630622	0.597689	0.608885	0.596222	0.589725	0.618612	0.594173	0.581722	0.606395	0.607335	0.585879	0.608349	0.58268	0.617097	0.564795	0.597911	0.609721	0.570985	0.58632	0.599363	0.602296	0.577016	0.580847	0.597081	0.578756	0.576153
KEGG_FATTY_ACID_METABOLISM	0.769914	0.751158	0.787053	0.727567	0.773059	0.745214	0.732315	0.734015	0.753227	0.768279	0.693148	0.781425	0.770252	0.709104	0.772662	0.760557	0.771035	0.743024	0.722229	0.743659	0.760932	0.74036	0.747067	0.762729	0.738181	0.750402	0.728439	0.774704	0.761424	0.740236	0.741889	0.759894	0.741139	0.761253	0.750264	0.740684	0.764745	0.710435	0.777487	0.757416	0.766233	0.737949	0.747769	0.736302	0.731257	0.745533	0.743756	0.756107	0.779959
KEGG_FRUCTOSE_AND_MANNOSE_METABOLISM	0.824868	0.862042	0.957089	0.848714	0.900577	0.827218	0.867872	0.85654	0.877949	0.867824	0.887807	0.858614	0.874892	0.893735	0.880508	0.865217	0.857162	0.898354	0.838522	0.912462	0.849996	0.90361	0.902843	0.888883	0.83995	0.87459	0.858112	0.86948	0.916683	0.836399	0.862919	0.878343	0.887421	0.845819	0.880522	0.790215	0.889574	0.889151	0.876067	0.870565	0.876794	0.864129	0.848475	0.850741	0.853068	0.827084	0.896642	0.777245	0.860622
KEGG_GALACTOSE_METABOLISM	0.871921	0.897585	1	0.906876	0.942703	0.888885	0.922453	0.918389	0.931212	0.933606	0.918337	0.896707	0.942516	0.939636	0.901096	0.919772	0.894863	0.907539	0.873535	0.935062	0.925281	0.937097	0.969123	0.930273	0.893862	0.922493	0.901355	0.929733	0.942324	0.901591	0.95709	0.91792	0.956473	0.901799	0.95704	0.890631	0.946903	0.93351	0.952616	0.918854	0.927639	0.907231	0.911116	0.924464	0.883093	0.903927	0.928227	0.866133	0.942273
KEGG_GLUTATHIONE_METABOLISM	0.905391	0.871051	0.867045	0.891375	0.887485	0.81532	0.8494	0.897576	0.876148	0.881204	0.824637	0.891195	0.883017	0.840939	0.860461	0.838581	0.892823	0.8102	0.86616	0.814538	0.836652	0.882611	0.856199	0.883126	0.907584	0.868318	0.839279	0.893448	0.895042	0.819804	0.861955	0.872225	0.827046	0.879762	0.865217	0.819928	0.918716	0.857871	0.839567	0.805916	0.879789	0.830738	0.850735	0.830107	0.835344	0.825185	0.827184	0.81986	0.843855
KEGG_GLYCEROPHOSPHOLIPID_METABOLISM	0.759912	0.775983	0.806461	0.787905	0.797879	0.748107	0.791846	0.759796	0.792822	0.767196	0.807694	0.765113	0.803569	0.815807	0.769272	0.775077	0.764889	0.77664	0.768529	0.820613	0.799744	0.809424	0.812088	0.821487	0.783436	0.790543	0.790784	0.790476	0.816158	0.802055	0.795593	0.803119	0.805215	0.782638	0.8148	0.76411	0.805715	0.814976	0.803223	0.797239	0.789712	0.798898	0.779809	0.778891	0.769821	0.762376	0.803885	0.698493	0.783315
KEGG_GLYCEROLIPID_METABOLISM	0.676129	0.684298	0.728463	0.686721	0.710166	0.665322	0.679122	0.683625	0.702966	0.692938	0.729114	0.675032	0.702341	0.710045	0.696819	0.67114	0.692525	0.706424	0.668055	0.699862	0.707691	0.696155	0.71597	0.715546	0.679616	0.696606	0.703813	0.671573	0.716218	0.681505	0.680392	0.730353	0.708968	0.69536	0.719035	0.662543	0.723311	0.719058	0.730528	0.692148	0.716029	0.710389	0.683837	0.689709	0.674323	0.695006	0.699572	0.634512	0.704682
KEGG_GLYCINE_SERINE_AND_THREONINE_METABOLISM	0.369324	0.396056	0.424288	0.357921	0.389121	0.417366	0.446865	0.440232	0.427005	0.407887	0.444902	0.407254	0.405144	0.482658	0.404839	0.391654	0.408413	0.444189	0.397863	0.432905	0.365584	0.42526	0.442527	0.460321	0.349429	0.389672	0.402837	0.382665	0.432467	0.406404	0.416057	0.389488	0.443336	0.37319	0.409142	0.403702	0.374703	0.484755	0.384418	0.406714	0.411705	0.390552	0.391795	0.408523	0.403566	0.386614	0.426495	0.466307	0.431886
KEGG_GLYOXYLATE_AND_DICARBOXYLATE_METABOLISM	0.809638	0.796728	0.80157	0.77953	0.801294	0.780561	0.719453	0.830475	0.74551	0.788239	0.756001	0.787732	0.764353	0.741583	0.785382	0.786131	0.778908	0.722672	0.781063	0.76835	0.796033	0.773458	0.761899	0.728244	0.774002	0.805334	0.726432	0.816777	0.770846	0.765302	0.761839	0.761776	0.760373	0.767093	0.759313	0.768377	0.789251	0.744478	0.788308	0.758582	0.758565	0.806525	0.721231	0.760777	0.736001	0.807706	0.739702	0.790505	0.766687
KEGG_HISTIDINE_METABOLISM	0.509974	0.468904	0.497183	0.48067	0.508105	0.440221	0.483519	0.490935	0.445696	0.446754	0.464784	0.502	0.477866	0.487739	0.497905	0.480985	0.499863	0.507154	0.515084	0.468151	0.491947	0.472194	0.497985	0.512377	0.456527	0.497552	0.474871	0.487251	0.474271	0.492514	0.444536	0.489225	0.446569	0.468579	0.482657	0.459616	0.486773	0.465599	0.500633	0.484686	0.483066	0.452887	0.473687	0.4536	0.450816	0.478667	0.448941	0.49165	0.493131
KEGG_INOSITOL_PHOSPHATE_METABOLISM	0.926476	0.952308	0.984977	0.984203	0.961919	0.945816	0.93842	0.93732	0.96398	0.935109	0.968218	0.936398	0.955559	0.966447	0.966686	0.957998	0.934958	0.970779	0.962616	0.976373	0.967131	0.937263	0.982546	0.9722	0.966441	0.942011	0.945066	0.948203	0.97158	0.963411	0.990391	0.971387	0.966087	0.955254	0.963093	0.951474	0.95136	0.939534	0.966243	0.973361	0.942969	0.969246	0.962708	0.949675	0.95016	0.942754	0.990192	0.8609	0.972181
KEGG_LINOLEIC_ACID_METABOLISM	0.0305679	0.0665522	0.0586646	0.106375	0.0622171	0.0218704	0.044305	0.0408315	0.00465877	0.0624239	0.0690956	0.012194	0.0376873	0.0568919	0.0426164	0.084125	0.0341123	0	0.0827068	0.103427	0.0741984	0.0416206	0.102442	0.0297318	0.0642918	0.0663758	0.0442752	0.0701435	0.0752472	0.102651	0.0182735	0.0772766	0.0893821	0.0485599	0.0616501	0.0625081	0.0720664	0.0305051	0.0950916	0.0913266	0.0452145	0.0586277	0.0800957	0.10534	0.0269467	0.0506212	0.0563495	0.0196162	0.0390187
KEGG_METABOLISM_OF_XENOBIOTICS_BY_CYTOCHROME_P450	0.305512	0.260666	0.245677	0.322534	0.296955	0.216325	0.224044	0.27595	0.236554	0.294427	0.217566	0.284823	0.278307	0.221106	0.26591	0.231067	0.286804	0.203501	0.292399	0.208212	0.256794	0.247852	0.227694	0.235838	0.288358	0.217817	0.222719	0.304694	0.302851	0.214631	0.259842	0.285013	0.200736	0.265225	0.268016	0.209603	0.313634	0.262835	0.246003	0.193904	0.250873	0.211584	0.271235	0.251608	0.216357	0.24286	0.234218	0.247175	0.238853
KEGG_NICOTINATE_AND_NICOTINAMIDE_METABOLISM	0.701591	0.73895	0.736469	0.745418	0.715179	0.69904	0.765755	0.764906	0.743928	0.74555	0.743011	0.756388	0.744071	0.773209	0.746704	0.738647	0.724975	0.73369	0.742566	0.712467	0.715367	0.768455	0.751975	0.697464	0.726923	0.750488	0.724694	0.740217	0.772256	0.73393	0.755454	0.737016	0.683935	0.716707	0.761099	0.72808	0.730749	0.781564	0.726486	0.717072	0.718524	0.729779	0.722686	0.720122	0.733553	0.723931	0.730996	0.685099	0.733771
KEGG_NITROGEN_METABOLISM	0.642358	0.666456	0.667384	0.646658	0.675343	0.651285	0.674576	0.640781	0.704805	0.688363	0.673886	0.657662	0.675178	0.684114	0.670658	0.660324	0.644974	0.680816	0.668743	0.657914	0.654775	0.67845	0.6773	0.657329	0.650896	0.669584	0.674868	0.680836	0.713896	0.64325	0.677286	0.647832	0.669945	0.637631	0.686237	0.643238	0.630133	0.682624	0.661933	0.653129	0.673492	0.688114	0.637544	0.633173	0.657185	0.657318	0.644886	0.647739	0.671725
KEGG_PHENYLALANINE_METABOLISM	0.51112	0.524394	0.581897	0.531385	0.535504	0.485708	0.590973	0.543856	0.588258	0.564892	0.627599	0.547895	0.538407	0.597013	0.539298	0.538648	0.555512	0.577916	0.507784	0.595763	0.547216	0.563406	0.598806	0.589481	0.525488	0.525128	0.535672	0.565777	0.56919	0.529427	0.535204	0.590773	0.566362	0.552273	0.513414	0.526875	0.532774	0.648871	0.529959	0.561857	0.554229	0.527549	0.493255	0.533022	0.486989	0.533571	0.538899	0.516286	0.522338
KEGG_PORPHYRIN_AND_CHLOROPHYLL_METABOLISM	0.87489	0.878358	0.815376	0.906881	0.831549	0.828785	0.80919	0.845374	0.849452	0.847731	0.797465	0.901446	0.829446	0.875189	0.880067	0.920921	0.85054	0.798111	0.86831	0.855698	0.871481	0.853199	0.851779	0.791318	0.828916	0.875249	0.805454	0.868336	0.835041	0.86075	0.857716	0.861023	0.815578	0.857207	0.836958	0.840183	0.865589	0.821307	0.858433	0.818421	0.834469	0.845748	0.822998	0.858979	0.830044	0.860594	0.78665	0.887471	0.836362
KEGG_PROPANOATE_METABOLISM	0.832052	0.770882	0.781415	0.799383	0.820234	0.781316	0.735707	0.815462	0.752948	0.754125	0.712074	0.812517	0.788595	0.742463	0.796905	0.787235	0.78116	0.758872	0.792547	0.750107	0.814918	0.762356	0.73523	0.766233	0.788483	0.787519	0.757486	0.814319	0.75056	0.755582	0.749153	0.763613	0.738803	0.81131	0.778736	0.77846	0.776249	0.679276	0.822627	0.80035	0.804895	0.754789	0.782957	0.758028	0.763452	0.818014	0.754575	0.848711	0.821457
KEGG_PURINE_METABOLISM	0.768646	0.7521	0.733367	0.761984	0.750943	0.760549	0.736439	0.772932	0.735787	0.748496	0.71796	0.764065	0.738279	0.745739	0.76051	0.750368	0.741819	0.729958	0.768061	0.716724	0.747837	0.7434	0.738923	0.733568	0.74939	0.759472	0.73211	0.751119	0.754713	0.736623	0.736139	0.747791	0.732612	0.751425	0.751063	0.725936	0.737198	0.714532	0.745715	0.741485	0.721067	0.736405	0.734207	0.729918	0.743594	0.741704	0.713156	0.733597	0.75054
KEGG_PYRIMIDINE_METABOLISM	0.950538	0.921847	0.904999	0.922471	0.924495	0.927551	0.908589	0.968216	0.899049	0.915856	0.866156	0.947006	0.909584	0.892129	0.91969	0.925745	0.904256	0.89492	0.9238	0.880206	0.901779	0.910787	0.90164	0.894904	0.922904	0.94186	0.921035	0.930539	0.923176	0.902409	0.897022	0.909506	0.9019	0.920371	0.904445	0.901198	0.913034	0.875347	0.908275	0.906381	0.884975	0.912024	0.902643	0.908327	0.906641	0.908457	0.869555	0.929504	0.912341
KEGG_PYRUVATE_METABOLISM	0.822909	0.778177	0.770555	0.775685	0.802891	0.79702	0.738885	0.80995	0.749177	0.771973	0.712991	0.793239	0.766831	0.736435	0.789625	0.796694	0.782212	0.756756	0.782467	0.760799	0.77983	0.750243	0.754166	0.754189	0.787988	0.796676	0.76487	0.797132	0.760058	0.765548	0.758826	0.76772	0.755649	0.784006	0.756808	0.793505	0.76881	0.697579	0.793818	0.797971	0.796626	0.761012	0.770667	0.789635	0.763099	0.789235	0.758777	0.808875	0.805345
KEGG_RETINOL_METABOLISM	0.119903	0.143616	0.133475	0.139771	0.132235	0.0957675	0.119981	0.0835584	0.139586	0.109001	0.132332	0.105529	0.111041	0.125734	0.15691	0.110505	0.126849	0.14305	0.14697	0.125384	0.166351	0.116376	0.124872	0.123052	0.122113	0.125131	0.0868681	0.163667	0.149604	0.0963275	0.118085	0.146751	0.101216	0.13853	0.144382	0.0826597	0.122679	0.152669	0.154496	0.0871937	0.100022	0.0937486	0.102448	0.135068	0.0891845	0.145596	0.116485	0.112075	0.126041
KEGG_RIBOFLAVIN_METABOLISM	0.657258	0.728784	0.65154	0.685099	0.694596	0.707693	0.710753	0.678949	0.696691	0.69499	0.679854	0.703725	0.715172	0.695037	0.741296	0.702291	0.691402	0.642685	0.689292	0.724955	0.678736	0.715388	0.689754	0.720421	0.753399	0.726884	0.679913	0.731819	0.719826	0.680497	0.697203	0.747586	0.691027	0.700227	0.690311	0.675505	0.691027	0.668335	0.704587	0.662474	0.67563	0.685085	0.70177	0.669194	0.696	0.643216	0.672199	0.684102	0.684832
KEGG_SELENOAMINO_ACID_METABOLISM	0.753091	0.714976	0.765538	0.731457	0.739088	0.708913	0.688007	0.696342	0.680048	0.714465	0.712143	0.723025	0.696566	0.68509	0.717241	0.694229	0.687291	0.692902	0.736224	0.69375	0.714656	0.725897	0.682635	0.717925	0.71086	0.721544	0.700552	0.714987	0.666397	0.692309	0.699741	0.67614	0.70792	0.712453	0.716808	0.715451	0.689396	0.673055	0.719328	0.694367	0.731338	0.699982	0.694821	0.708136	0.698437	0.698298	0.715024	0.746663	0.719144
KEGG_SPHINGOLIPID_METABOLISM	0.694954	0.710726	0.752444	0.715788	0.738862	0.689729	0.713247	0.718312	0.720315	0.716582	0.732518	0.690874	0.71112	0.724469	0.721829	0.716365	0.745345	0.731864	0.70838	0.765069	0.756985	0.753839	0.746845	0.764722	0.730231	0.728117	0.747159	0.748093	0.758413	0.720263	0.733181	0.753143	0.727196	0.705625	0.743979	0.711887	0.765845	0.733756	0.745154	0.736535	0.744271	0.758067	0.719723	0.7149	0.711354	0.69658	0.781251	0.699843	0.736958
KEGG_STARCH_AND_SUCROSE_METABOLISM	0.626228	0.661554	0.727971	0.725747	0.683493	0.622739	0.633191	0.673626	0.678367	0.64883	0.646315	0.642859	0.680183	0.706203	0.68235	0.671091	0.643946	0.683177	0.658809	0.662432	0.70079	0.684197	0.696096	0.665227	0.629037	0.672981	0.656348	0.686227	0.712648	0.656992	0.713619	0.681791	0.658511	0.658721	0.717872	0.653928	0.713031	0.700042	0.687562	0.669814	0.67093	0.658443	0.664165	0.661449	0.641819	0.677326	0.693118	0.647486	0.676066
KEGG_SULFUR_METABOLISM	0.725472	0.72385	0.819767	0.707756	0.739582	0.643206	0.790741	0.733844	0.78046	0.697966	0.774591	0.663888	0.808613	0.823484	0.698296	0.717409	0.752528	0.693523	0.64828	0.772586	0.703706	0.746174	0.741715	0.775697	0.664204	0.715672	0.752096	0.776351	0.76844	0.772044	0.782175	0.730885	0.776173	0.710748	0.744919	0.74104	0.80077	0.781842	0.758834	0.692031	0.768292	0.708225	0.74518	0.719838	0.676372	0.692432	0.815331	0.636142	0.699929
KEGG_TAURINE_AND_HYPOTAURINE_METABOLISM	0.130437	0.215377	0.264462	0.230973	0.184163	0.202861	0.187967	0.138372	0.225978	0.18209	0.272272	0.14098	0.16715	0.244747	0.151944	0.151356	0.221937	0.249175	0.171256	0.236687	0.174092	0.224406	0.217614	0.197638	0.192786	0.24056	0.204808	0.159934	0.174766	0.227378	0.184533	0.172074	0.22692	0.195562	0.18293	0.153958	0.215434	0.243536	0.219639	0.220193	0.248993	0.205158	0.217952	0.182723	0.167847	0.190117	0.262974	0.177072	0.21661
KEGG_TRYPTOPHAN_METABOLISM	0.480975	0.470966	0.479963	0.482829	0.49628	0.453187	0.426335	0.484196	0.454807	0.482619	0.447599	0.45611	0.459527	0.446472	0.498658	0.47613	0.482282	0.491918	0.472345	0.468209	0.507929	0.455638	0.491646	0.488732	0.453302	0.485434	0.443126	0.493447	0.480546	0.474272	0.461458	0.505666	0.459439	0.490477	0.45612	0.469705	0.496948	0.458028	0.513989	0.485652	0.511176	0.459453	0.487159	0.494834	0.468591	0.504807	0.458558	0.483256	0.506454
KEGG_TYROSINE_METABOLISM	0.376694	0.343075	0.37671	0.356923	0.375949	0.31837	0.382588	0.349901	0.352012	0.356724	0.334415	0.374848	0.344217	0.355811	0.340338	0.350379	0.352232	0.365768	0.342999	0.351134	0.35044	0.330353	0.371648	0.340103	0.345347	0.332317	0.332533	0.379913	0.381825	0.332306	0.321009	0.35438	0.33223	0.356413	0.31657	0.317811	0.335435	0.397183	0.340921	0.32702	0.328444	0.324461	0.295061	0.358372	0.292866	0.342106	0.325439	0.351453	0.335369
[truncated: 8 more columns]
