# Supplementary material for: The identification of metabolism-related subtypes and potential treatments for idiopathic pulmonary fibrosis
Source: Front Pharmacol. 2023 May 18;14:1173961. doi: 10.3389/fphar.2023.1173961 (PMC10232787; doi:10.3389/fphar.2023.1173961)
Supplement: Supplementary file 6 [file Table6.xls]

## Sheet: Genes in yellow module
	gene
1	PLA2G4A
2	GNPDA2
3	PGM3
4	UGP2
5	GGT1
6	AMD1
7	DPYD
8	BDH2
9	MTAP
10	MTR
11	FMO5
12	PAFAH1B1
13	ACADSB
14	ACSL3
15	RRM2B
16	ETNK1
17	GPAM
18	GPD2
19	DLD
20	IMPA1
21	PIK3C2A
22	PIK3C3
23	PIKFYVE
24	SYNJ1
25	PCCA
26	SUCLA2
27	ENTPD1
28	NME7
29	PDE3B
30	POLA1
31	POLR2B
32	AK3
33	CMPK1
34	RFK
35	ASAH1
36	GALC
37	SPTLC1
38	AGL
39	AMY1C
40	PGM2L1
41	KMO
